# Supplementary material for: SSREnricher: a computational approach for large-scale identification of polymorphic microsatellites based on comparative transcriptome analysis
Source: PeerJ. 2020 Jul 2;8:e9372. doi: 10.7717/peerj.9372 (PMC7335497; doi:10.7717/peerj.9372)
Supplement: Supplemental Information 2 [file peerj-08-9372-s002.xlsx]

## Sheet: Grass carp
Locus	Primer sequence(5’→3’)	Ta (°C)	Repeat motif	Size range (bp)	Genbank
Ci-SSR1	F: CGCTTAGACCACAGATGC	54	(AC)11	129-145	KU365257
	R: CTTGGCTACGATACCTTGAT
Ci-SSR2	F: TCTATGGGTTCAACAGCC	57.5	(ATT)10	251-285	KU365258
	R: CATTATGGATTGGGAGCA
Ci-SSR3	F: AAGGCAGAAGAAAGACGA	57.5	(GT)16	140-152	KU365259
	R: AAATACTGTTCCATCACCC
Ci-SSR4	F: TGTTGAACCTAAAGGCAGAG	56	(TG)14	200-222	KU365260
	R: ATTGGGGAAATACGAAAAG
Ci-SSR5	F: GGAAGCCTTGGAGTATCAC	56	(AC)12	206-234	KU365261
	R: TGTCTCGGTAGAAATGTTG
Ci-SSR6	F: CTCCGAGTGCCCTTTACC	57.5	(TC)15	213-245	KU365262
	R: TCAGGCGAAGCAAGACAA
Ci-SSR7	F: AAATCCAAAGGGAACGAG	54	(GT)8	221-239	KU365263
	R: GCAGCAAGAAGAAGAGGC
Ci-SSR8	F: ACAGATTCAGTGCCTATTT	57.5	(GT)10	199-223	KU365264
	R: AACCGTTACAGACCTTTG
Ci-SSR9	F: CAGGACGGCTGAGTAAAT	56	(CT)11	103-133	KU365265
	R: GAGACTGAACCCTTGGAG
Ci-SSR10	F: TCTCCCAAACGGCAATCC	56	(GT)10	88-124	KU365266
	R: CACACTCCATCTCCTCCATACA
Ci-SSR11	F: CGCTTAGACCACAGATGC	57.5	(AC)12	131-155	KU365267
	R: CTTGGCTACGATACCTTGAT
Ci-SSR12	F: CGTGTTGGGTGGAGTATGA	54	(GT)14	201-225	KU365268
	R: TGGTGGCTCTGTTTGGAT
Ci-SSR13	F: TTACGCATCTAATCCCACG	57.5	(GA)11	174-198	KU365269
	R: GTTGCCGAGCACTGTTGA
Ci-SSR14	F: AGAAGGAGTGGTTTGCTA	56	(AT)18	185-207	KU365270
	R: AGTTACTGAGATGGTGGC
Ci-SSR15	F: AGATGAATCGTCGGAGTT	57.5	(GT)9	230-256	KU365271
	R: CAATAAGAAGCCAGTAAGC
Ci-SSR16	F: ACACTTCATCCAAAACTC	54	(GT)11	244-266	KU365272
	R: GCATCCAACATAAAATAC
Ci-SSR17	F: AAAAGGCAATAAGCATCAG	56	(TG)10	175-193	KU365273
	R: AACCAGGCATTTACAGCA
Ci-SSR18	F: ATCCTCCAGCATCATTCA	59	(AC)8	105-137	KU365274
	R: GCTCCTCATACGGTTCTC
Ci-SSR19	F: ACCGAACCGAACGAGAAT	56	(AG6	222-236	KU365275
	R: TCCCGCTTTGACTTACCC
Ci-SSR20	F: ACCGACTCGTTTCCATCT	54	(TG)12	256-284	KU365276
	R: CCACCGTCACCTTCACTA

## Sheet: Rice
Locus	Primer sequence(5’→3’)	Ta (°C)	Repeat motif	Size range (bp)	Genbank
Os-SSR1	F: ATGGGCTAAATCCGAACC	54	(AG)9	275-297	KU365211
	R: GAAAGGGACCAAACAACAC
Os-SSR2	F: TCTCCTTTTGTTGCTTCCAT	57.5	(GA)9	266-284	KU365212
	R: GCTGCTCCTTTCGCTTGA
Os-SSR3	F: CACCCTCGCCCAAAACCC	57.5	(CCG)5	273-297	KU365213
	R: GCCCCGACGCATACTCCA
Os-SSR4	F: CTTCTTCCTCCCGCTCCC	56	(GCG)8	267-288	KU365214
	R: CAATCCCAACCCACCACC
Os-SSR5	F: CTCTTCGTTGTTCCCATTCAC	57.5	（CGC）6	171-186	KU365236
	R: GGCGGCACCACCTTTTTG
Os-SSR6	F: AATCAGCAACCCAAAGTC	54	(CT)7	121-135	KU365215
	R: ATGTCACAGTCCAAACCAG
Os-SSR7	F: CGACCATAGAAGTTTGCC	54	(GAA)7	131-155	KU365216
	R: ACGCCTGACGATGATTAG
Os-SSR8	F: TCCCGCCTCGCCGCTGTC	56	(CAG)5	139-160	KU365217
	R: TGCGTTCCCCTGCCCTTG
Os-SSR9	F: ACTACTGCTATGTGTCAATGTG	57.5	(GT)6	273-285	KU365218
	R: ATAACCTCCCAGCCCAAC
Os-SSR10	F: AGTTGTAGTTGTTGCTGGC	56	(CTC)6	218-239	KU365219
	R: GATGTGGTTCAGGAGGTTG
Os-SSR11	F: CTTCCTCCTATGCGATTC	56	(CG)6	163-177	KU365220
	R: TTACCATTTCTGTCCCTTT
Os-SSR12	F: GTCACTTTCATACCGTCAGC	57.5	(CTT)12	249-260	KU365221
	R: CTTCCACCACCCACCATC
Os-SSR13	F: TGGGATTTGAGATGACAGA	56	(CCG)5	145-157	KU365222
	R: CAACCGCCATACACTACAC
Os-SSR14	F: TTATCGCCATCTTCATCAG	54	(GGC)7	113-127	KU365223
	R: CACTCCACTTCCCCAACA
Os-SSR15	F: TCCAAAATCAATGAAAGTCC	56	(CAG)5	181-196	KU365224
	R: AGCAGGTCAGCAGAGCAA
Os-SSR16	F: GGAGTTTTGGGGATGGAC	54	(AC)6	247-263	KU365225
	R: GCGTGGATTGTGATTATG
Os-SSR17	F: CGCACCTACTTCAACCCC	57.5	(CGC)7	151-169	KU365226
	R: GACCCCTCTTCCACTCCC
Os-SSR18	F: TATGGTATGAGGCGAAGG	54	（GA）10	301-321	KU365235
	R: TATGGTATGAGGCGAAGG
Os-SSR19	F: TGCGACAGAAGCAAAAGG	59	(AG)12	270-286	KU365227
	R: ATCAAGAGGGCGGAGAAC
Os-SSR20	F: ACTTGAGACCTTCTTGAT	56	（CTG）7	230-248	KU365234
	R: GCATTCGTAAACCCTGAG
Os-SSR21	F: ATCCTTTCCAGAATCCGTC	56	（CTG）5	218-233	KU365228
	R: CTACCAGACCCCTCCTCC
Os-SSR22	F: GCAAGCCTGCGAGAGAGC	54	（GCC）5	151-175	KU365229
	R: TCTACTACGACGCCGAGGG
Os-SSR23	F: TTCTTGATTCTTTCCTTTCT	56	（TG）7	176-194	KU365230
	R: CCTACCAGCCTAACCTTT
Os-SSR24	F: GGAGGAAAACGCAATCAATC	54	（CCG）6	240-251	KU365231
	R: GCGGCGAGCATTAGGGTT
Os-SSR25	F: CTCCTATGCCAAATGGTTAC	57.5	（GAG）8	178-193	KU365232
	R: CTCGTCCTGTCCGTCCTC
Os-SSR26	F: TACGGCATAGGGTGGACG	56	（GAG）6	281-296	KU365233
	R: GTCAAGCCAGGTCTCGGG
Os-SSR27	F: TCGGAGTTGAGGTTGGCG	56	（TC）13	265-283	KU365281
	R: GCAGAAGACGGCATACGAGAT
